# Supplementary material
Source: PubMed Central journal article supplement (PMC2930415)
Supplement: 1009874107_pnas.201009874SI.pdf [file 1009874107_pnas.201009874SI.pdf]

# Supporting Information

Bateup et al. 10.1073/pnas.1009874107

## SI Materials and Methods

**Generation of DARPP-32 Conditional KO Mice.** Floxed DARPP-32 mice were generated by Cell & Molecular Technologies. A targeting vector was generated in which loxP sites were inserted surrounding exons 1–4 of the mouse DARPP-32 gene. An FRT flanked neomycin cassette was inserted between exon 4 and the 3' loxP site. The targeting vector included right and left homology arms, which were used to target the construct to the endogenous DARPP-32 locus. The targeted construct was electroporated into ES cells derived from C57BL/6 mice. Neomycin-resistant clones were screened by Southern blot analysis for correct homologous recombination using a 3' external probe and a 5' internal probe and EcoRV digestion. The neomycin cassette was excised *in vitro* by expression of FLPe recombinase to generate the final conditional floxed allele. A Southern blot strategy was used to detect cells with correct excision of the Neo cassette. These cells were used to generate chimeras by injection into C57BL/6 blastocysts using standard techniques. Germline transmission was confirmed by PCR genotyping, and heterozygous floxed DARPP-32 mice were interbred to generate homozygous floxed DARPP-32 mice.

Floxed DARPP-32 mice were bred to either D1R-Cre (EY262) or D2R-Cre (ER44) BAC transgenic mice (1) to generate DARPP-32 conditional KO mice. To generate experimental animals, homozygous floxed Cre-positive mice were bred to homozygous floxed Cre-negative mice. The resulting offspring were all homozygous floxed and either hemizygous or negative for D1R-Cre or D2R-Cre. Mice used in experiments were >90% C57BL/6 background as determined by single nucleotide polymorphism genotyping for strain-specific markers. The following primers were used for genotyping from tail DNA:

|                 |                                                                                                                           |
|-----------------|---------------------------------------------------------------------------------------------------------------------------|
| Floxed DARPP-32 | For 5'-CTAGTTGCTCTAGGTGCTCTGTGCTCTGTC-3'<br>Rev 5'-CCCTTCAACCTACTGTTAAGACCTAGCTG-3'<br>wt band 375 bp; floxed band 485 bp |
| D1R-Cre         | For 5'-AGGGGCTGGGTGGTGAAGTATTG-3'<br>Rev 5'-CGCCGCATAACCACTGAAACAGC-3'<br>451 bp band                                     |
| D2R-Cre         | For 5'-AGCATGCCTTGAACCACTCTG-3'<br>Rev 5'-CACCGCATCAACGTTTTCTTTTC-3'<br>458 bp band                                       |

To verify cell type-specific deletion of DARPP-32, conditional KO mice were bred to BAC transgenic mice expressing EGFP under the control of the D1R or D2R promoters (2).

**Western Blot Analysis.** Mice were killed by focused microwave irradiation and striata were rapidly removed and frozen at  $-80^{\circ}\text{C}$ . Striata were sonicated and boiled in 1% SDS, and total protein concentration was determined using a BCA assay (Pierce). Then 15  $\mu\text{g}$  of protein was loaded onto 10.5–14% Tris-HCl gels, separated by electrophoresis, and transferred to PVDF membranes. Membranes were blocked for 1 h in 5% milk in TBS/Tween-20 and incubated overnight at  $4^{\circ}\text{C}$  with a primary antibody against DARPP-32 (3). Antibody binding was revealed by HRP-conjugated goat anti-mouse IgG and the ECL detection method (PerkinElmer) using Kodak BioMax film. Membranes were stripped (Reblot Plus strong stripping buffer; Chemicon) and reprobed using an antibody against actin (Abcam). Quantification

of bands was done by densitometry, using National Institutes of Health Image software version 1.52.

**Immunofluorescence.** Mice were perfused transcardially with 1 $\times$  PBS and 4% paraformaldehyde. Brains were postfixed in 4% paraformaldehyde for 1 h, cryoprotected in sucrose, and frozen at  $-80^{\circ}\text{C}$  until sectioning at 12  $\mu\text{m}$  (Fig. 2 A–D). Alternatively, brains were postfixed overnight in the same solution and stored at  $4^{\circ}\text{C}$ . Then 30- $\mu\text{m}$ -thick sections were cut with a vibratome (Leica) and stored at  $-20^{\circ}\text{C}$  in a solution containing 30% (vol/vol) ethylene glycol, 30% (vol/vol) glycerol, and 0.1 M sodium phosphate buffer until they were processed for immunofluorescence (Fig. 2 E–G). Sections were blocked for 1 h in 2% normal serum and incubated overnight at  $4^{\circ}\text{C}$  with antibodies against NeuN (Chemicon), DARPP-32 (Novus), and/or GFP (provided by Dr. Myriam Heiman, Rockefeller University, NY, NY). Slides were washed and incubated with Alexa Fluor 488– (Invitrogen), Cy2-, and/or Cy3- (Jackson ImmunoResearch) conjugated secondary antibodies. Fluorescent images were obtained with a Zeiss confocal microscope.

**Electrophysiology.** BAC mice expressing EGFP in D1R or D2R neurons (2) were bred to the  $\text{D32}^{\text{fl/fl}}\text{D1RCre}^+$  and  $\text{D32}^{\text{fl/fl}}\text{D2RCre}^+$  mice, respectively, to identify D1R and D2R MSNs for electrophysiology. Parasagittal corticostriatal slices were obtained from 19- to 30-d-old  $\text{D32}^{\text{wt/wt}}\text{D1RCre}^+\text{D1RGFP}^+$  and  $\text{D32}^{\text{wt/wt}}\text{D2RCre}^+\text{D2RGFP}^+$  (controls) or  $\text{D32}^{\text{F/F}}\text{D1RCre}^+\text{D1RGFP}^+$  and  $\text{D32}^{\text{F/F}}\text{D2RCre}^+\text{D2RGFP}^+$  (conditional KO) mice. Experiments were performed in the dorsal striatum at room temperature. Electrical access was achieved through the perforated-patch method using amphotericin B. EPSPs were evoked by focal extracellular stimulation with a small theta glass electrode positioned  $\sim 100$   $\mu\text{m}$  from the recording electrode. Stimulation intensity (0.2 ms, 5–30  $\mu\text{A}$ ) was adjusted to evoke baseline single-component EPSPs. Back-propagating APs were evoked by direct somatic current injection (5 ms, 1–1.5 nA). Long-lasting synaptic plasticity was induced using a protocol consisting of subthreshold synaptic stimulation paired with bAPs at theta frequency (5 Hz). This protocol consisted of 10–15 trains of five bursts repeated at 0.1 Hz, with each burst composed of three bAPs preceded with three EPSPs at 50 Hz. To ensure induction of consistent synaptic plasticity, postsynaptic neurons were depolarized to  $-70$  mV from their resting membrane potentials (typically  $-85$  mV) during induction. GABA<sub>A</sub> receptors were blocked by the bath application of bicuculline methiodide (10  $\mu\text{M}$ ).

**Open-Field Testing of Basal Locomotor Activity.** Mice were brought into the testing room in their home cages at least 1 h before testing. The 8- to 12-wk-old female and male mice were kept separate and tested on different d. Mice were placed in the open-field chambers consisting of 38 cm (L)  $\times$  25 cm (W)  $\times$  17 cm (H) white plastic boxes covered with a clear Plexiglas lid left open at the edge for ventilation. Four mice were tested simultaneously using four identical side-by-side chambers. Locomotor activity was recorded using an overhead Panasonic digital camera. Mice were tracked using EthoVision software version 3.1 (Noldus), which sampled the  $x/y$  location of the mice in the chambers six times per second and recorded the distance traveled in centimeters in 3-min bins.

**Locomotor Response to Cocaine.** 8–12 wk-old male mice were injected with saline or cocaine (15 mg/kg i.p.) and immediately placed individually into a clean plastic mouse cage (18 cm  $\times$  28 cm)
